# Supplementary material for: A self-powered piezotronic strain sensor based on single ZnSnO3 microbelts
Source: Royal Society of Chemistry journal article supplement (doi:10.1039/c3ra45027a), 2013-01-01
Supplement: c3ra45027a.pdf [file c3ra45027a.pdf]

## Self-Powered Piezotronic Strain Sensor Based on Single ZnSnO<sub>3</sub> Microbelts

Jyh Ming Wu,<sup>\*1</sup> Kuan-Hsueh Chen,<sup>2</sup> Yan Zhang,<sup>3</sup> and Zhong Lin Wang<sup>\*3, 4</sup>

<sup>1</sup> Department of Materials Science and Engineering, National Tsing Hua University, 101, Section 2 Kuang Fu Road, Hsinchu 300, Taiwan.

E-mail: [wujm@mx.nthu.edu.tw](mailto:wujm@mx.nthu.edu.tw)

<sup>2</sup> Department of Materials Science and Engineering, Feng-Chia University

<sup>3</sup> School of Materials Science and Engineering, Georgia Institute of Technology, Atlanta, Georgia 30332-0245, USA. E-mail: [zlwang@gatech.edu](mailto:zlwang@gatech.edu)

<sup>4</sup> Beijing Institute of Nanoenergy and Nanosystems, Chinese Academy of Sciences, China

### Supplementary information S1

The thermionic emission-diffusion phenomena were dominated in our strain sensor devices, as given by the equation 1 below.

$$I = A \cdot R \cdot T^2 \exp\left(\sqrt{\frac{q^3 \left[\frac{2qD}{k_s} (V_{bi} + V - kT/q)\right]^{\frac{1}{2}}}{4\pi k_s}} - \frac{\phi_s}{kT}\right) \quad (1)$$

where A is the area of the source Schottky barrier, R is the effective Richardson constant, q is the electron charge, D is the donor impurity density, k is the Boltzman constant, k<sub>s</sub> is the permittivity of ZnSnO<sub>3</sub>, and V<sub>bi</sub> is the potential at barrier. Figure S1 shows that the ln I-V<sup>1/4</sup> curve is almost linear. As subjected by varied tensile and compressive strains to ZnSnO<sub>3</sub> microbelt, the SBH for the metal-semiconductor-metal (MSM) structure in microbelt is a combination effect from both strain induced the change of piezoelectric polarization and band structure.<sup>1</sup>

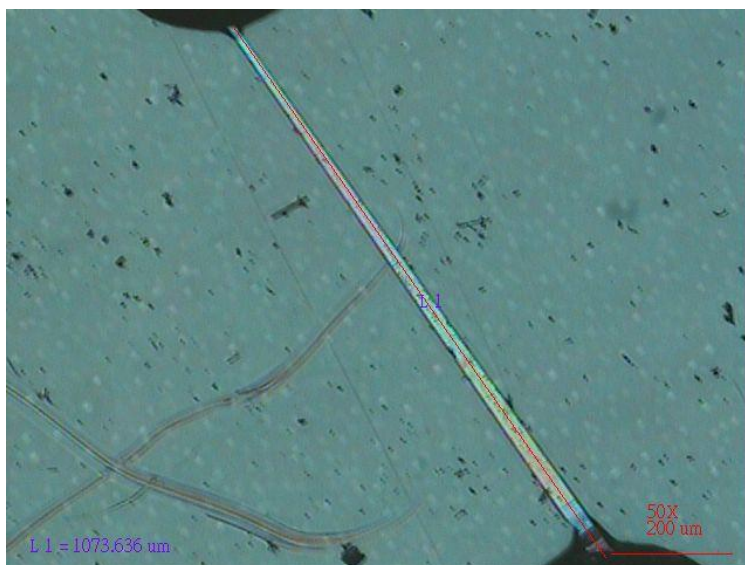

Figure S1 Digital micrograph image shows the length of the microbelts can up to 500-1000 $\mu\text{m}$ .

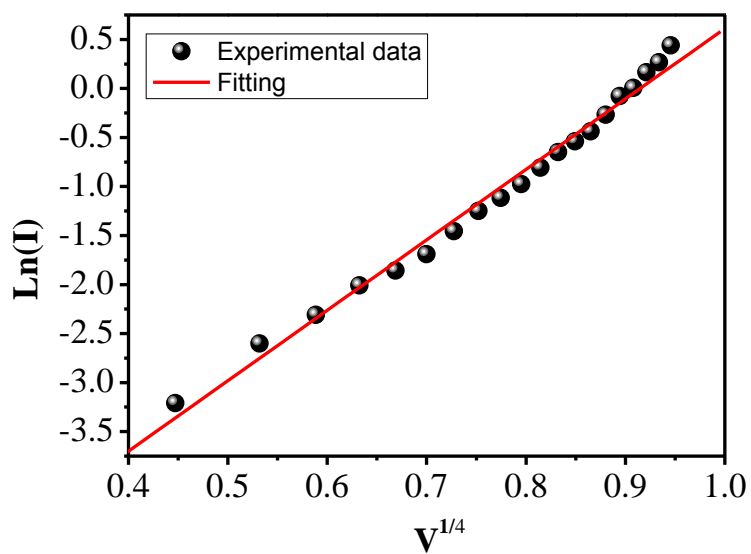

Figure S2 Plot of  $\ln I$  as a function  $V^{1/4}$  as data provide from Figure 2(a)

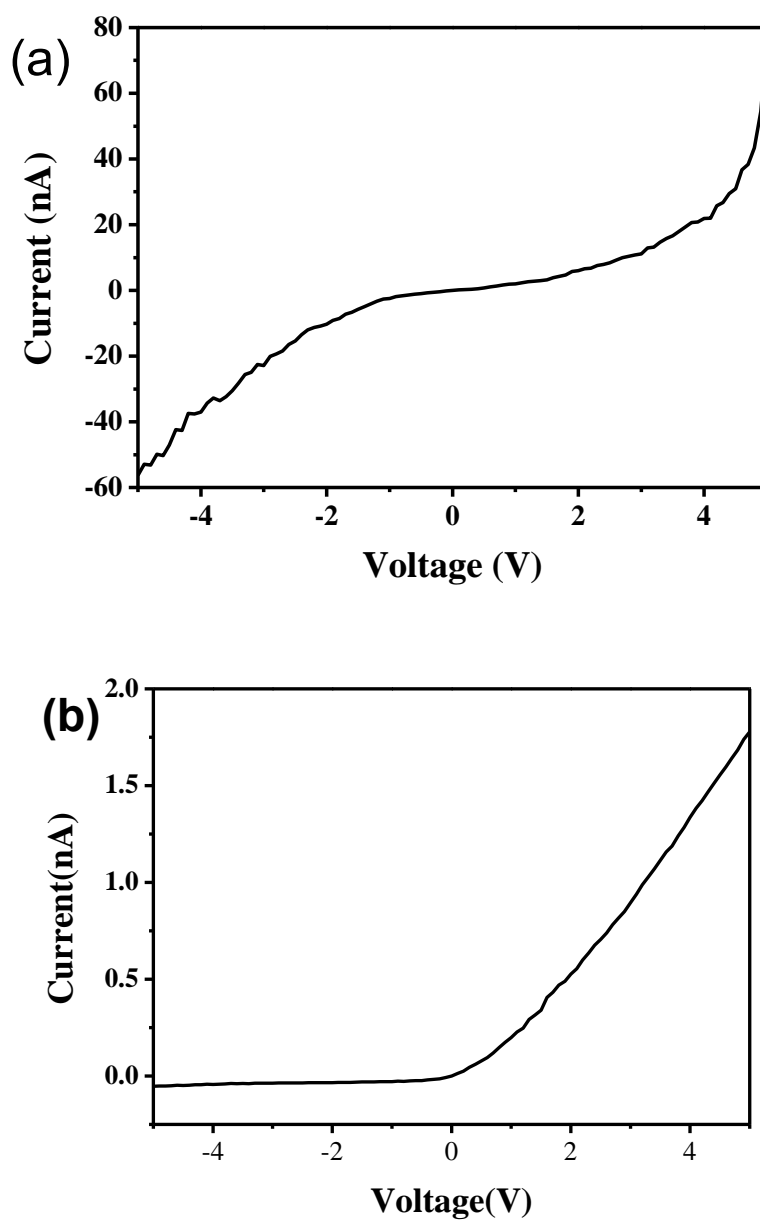

Figure S3. (a) I-V curve of strain sensor, the calculated inner resistance is  $\sim 2.81 \times 10^8 \Omega$ ;

(b) I-V curve of nanogenerator, the calculated inner resistance is  $\sim 3.45 \times 10^{10} \Omega$ .

## Reference:

1. (a) Zhou, J.; Fei, P.; Gu, Y. D.; Mai, W. J.; Gao, Y. F.; Yang, R.; Bao, G.; Wang, Z. L., Piezoelectric-Potential-Controlled Polarity-Reversible Schottky Diodes and Switches of ZnO Wires. *Nano Lett.* **2008**, *8*, 3973-3977; (b) Zhou, J.; Gu, Y. D.; Fei, P.; Mai, W. J.; Gao, Y. F.; Yang, R. S.; Bao, G.; Wang, Z. L., Flexible Piezotronic Strain Sensor. *Nano Lett.* **2008**, *8*, 3035-3040.
